# Supplementary material for: Anti-inflammatory activity of plant sterols in a co-culture model of intestinal inflammation: focus on food-matrix effect
Source: Royal Society of Chemistry journal article supplement (doi:10.1039/d4fo00917g), 2024-01-01
Supplement: d4fo00917g1.pdf [file d4fo00917g1.pdf]

**Table 1S.** Sterol content (mg/100g) in plant sterol (PS) food supplement and PS-enriched beverage and rye bread

|                       | PS food supplement* | PS-enriched beverage | PS-enriched rye bread |
|-----------------------|---------------------|----------------------|-----------------------|
| Cholesterol           | -                   | 12.7 ± 2.3           | -                     |
| Campesterol           | 6658 ± 264          | 62.0 ± 4.0           | 156.2 ± 7.2           |
| Campestanol           | 1963 ± 90           | 12.0 ± 1.0           | 23.3 ± 2.1            |
| Stigmasterol          | 478 ± 16            | 5.0 ± 0.3            | 9.3 ± 0.6             |
| β-Sitosterol          | 60661 ± 774         | 742.2 ± 55.8         | 1722.9 ± 72.9         |
| Sitostanol            | 15855 ± 645         | 91.0 ± 1.7           | 227.3 ± 9.5           |
| Δ5-Avenasterol        | 85 ± 4              | -                    | 15.3 ± 1.1            |
| Δ5,24-Stigmastadienol | 247 ± 3             | -                    | 5.1 ± 0.7             |
| Δ7-Stigmastenol       | 505 ± 17            | -                    | 13.7 ± 1.2            |
| Δ7-Avenasterol        | 332 ± 13            | -                    | 7.6 ± 1.0             |
| Total PS              | 86783 ± 1787        | 912.2 ± 59.8         | 2180.4 ± 90.4         |

Data are expressed as mean ± standard deviation ( $n = 3$ ). \*Data obtained experimentally in the present study. The sterol content in the beverage and bread is described by Makran *et al.*<sup>24</sup> and Faubel *et al.*<sup>25</sup>, respectively.
